# Supplementary material for: Mapping three new interspecific hybrid sterile loci between Oryza sativa and O. glaberrima
Source: PubMed Central journal article supplement — Breed Sci. 2014 Mar 1;63(5):476–82. doi: 10.1270/jsbbs.63.476 (PMC3949584; doi:10.1270/jsbbs.63.476), 2014-03-01
Supplement: 63_476_s1.pdf [file 63_476_s1.pdf]

**Supplemental Table 1.** Information of the fifty-nine *Oryza glaberrima* accessions introduced from the International Rice Research Institute (IRRI) used for pollen grain and spikelet fertility studies at Yunnan Academy of Agricultural Sciences (YAAS)

| Accession                      | No. of YAAS     | Origin        |
|--------------------------------|-----------------|---------------|
| CG17                           | FCRI/YAAS 10175 | Cote d'Ivoire |
| IRGC100140                     | FCRI/YAAS 11006 | Gambia        |
| IRGC100149                     | FCRI/YAAS 11007 | Gambia        |
| IRGC100156                     | FCRI/YAAS 11009 | Gambia        |
| IRGC101842                     | FCRI/YAAS 11017 | Senegal       |
| IRGC101854                     | FCRI/YAAS 11018 | B.Faso        |
| IRGC101901                     | FCRI/YAAS 11021 | Nigeria       |
| IRGC102254                     | FCRI/YAAS 11028 | Liberia       |
| IRGC102295                     | FCRI/YAAS 11036 | Liberia       |
| IRGC102304                     | FCRI/YAAS 11038 | Liberia       |
| IRGC102305                     | FCRI/YAAS 11039 | Liberia       |
| IRGC102310                     | FCRI/YAAS 11040 | Liberia       |
| IRGC102316                     | FCRI/YAAS 11041 | Liberia       |
| IRGC102375                     | FCRI/YAAS 11052 | Liberia       |
| IRGC102513                     | FCRI/YAAS 11059 | Liberia       |
| IRGC102540                     | FCRI/YAAS 11060 | Liberia       |
| IRGC102555                     | FCRI/YAAS 11062 | Liberia       |
| IRGC102556                     | FCRI/YAAS 11063 | Liberia       |
| IRGC102583                     | FCRI/YAAS 11069 | Liberia       |
| IRGC102601                     | FCRI/YAAS 11070 | Liberia       |
| IRGC102671                     | FCRI/YAAS 11077 | Liberia       |
| IRGC102692                     | FCRI/YAAS 11079 | Liberia       |
| IRGC102718                     | FCRI/YAAS 11080 | Liberia       |
| IRGC102726                     | FCRI/YAAS 11085 | Liberia       |
| IRGC102846                     | FCRI/YAAS 11086 | Mali          |
| IRGC102928                     | FCRI/YAAS 11089 | Mali          |
| IRGC102833                     | FCRI/YAAS 11090 | Mali          |
| IRGC102939                     | FCRI/YAAS 11091 | Mali          |
| IRGC102950                     | FCRI/YAAS 11094 | Mali          |
| IRGC102986                     | FCRI/YAAS 11095 | Mali          |
| IRGC103144                     | FCRI/YAAS 11097 | Mali          |
| IRGC103145                     | FCRI/YAAS 11098 | Mali          |
| IRGC103146                     | FCRI/YAAS 11099 | Mali          |
| IRGC103147                     | FCRI/YAAS 11100 | Mali          |
| IRGC103232                     | FCRI/YAAS 11101 | Mali          |
| IRGC103466                     | FCRI/YAAS 11104 | B. Faso       |
| IRGC103469                     | FCRI/YAAS 11105 | B. Faso       |
| IRGC103475                     | FCRI/YAAS 11111 | Mali          |
| IRGC103482                     | FCRI/YAAS 11118 | Mali          |
| IRGC103483                     | FCRI/YAAS 11119 | Mali          |
| IRGC103502                     | FCRI/YAAS 11123 | Mali          |
| IRGC103503                     | FCRI/YAAS 11124 | Mali          |
| IRGC130612                     | FCRI/YAAS 11128 | Mali          |
| IRGC103956                     | FCRI/YAAS 11134 | Senegal       |
| IRGC103973                     | FCRI/YAAS 11137 | Nigeria       |
| IRGC103976                     | FCRI/YAAS 11138 | Nigeria       |
| IRGC103977                     | FCRI/YAAS 11139 | Nigeria       |
| IRGC103983                     | FCRI/YAAS 11141 | Nigeria       |
| IRGC104005                     | FCRI/YAAS 11148 | Nigeria       |
| IRGC104021                     | FCRI/YAAS 11150 | Guinea-BL.    |
| IRGC104023                     | FCRI/YAAS 11152 | Guinea-BL.    |
| IRGC104025                     | FCRI/YAAS 11154 | Guinea-BL.    |
| IRGC104032                     | FCRI/YAAS 11161 | Guinea-BL.    |
| IRGC104038                     | FCRI/YAAS 11162 | Senegal       |
| IRGC104039                     | FCRI/YAAS 11163 | Chad          |
| IRGC104162                     | FCRI/YAAS 11170 | Guinea        |
| IRGC104586                     | FCRI/YAAS 11175 | Cameroon      |
| <i>O. glaberrima</i> Acc102528 | FCRI/YAAS 11180 | Liberia       |
| <i>O. glaberrima</i> Acc102627 | FCRI/YAAS 11181 | Liberia       |
